# Supplementary material for: A highly selective and sensitive fluorescence sensor for the detection of apigenin based on nitrogen doped carbon dots and its application in cell imaging
Source: Royal Society of Chemistry journal article supplement (doi:10.1039/c7ay02202f), 2017-01-01
Supplement: c7ay02202f1.pdf [file c7ay02202f1.pdf]

## A Highly Selective and Sensitive Fluorescence Sensor for the Detection of Apigenin based on Nitrogen Doped Carbon Dots and its application in cell imaging

Jing Li<sup>a</sup>, Jinping Song<sup>b</sup>, Xiaomin Liang<sup>a</sup>, Qi Ma<sup>\*b</sup>, Lazhen Shen<sup>b</sup>, Yong Guo<sup>b</sup> and Feng Feng<sup>\*b</sup>

*a. School of Chemistry and Material Science, Shanxi Normal University, Linfen, 041001, China*

*b College of Chemistry and Environmental Engineering, and Institute of Applied Chemistry,  
Shanxi Datong University, Datong, Shanxi, 037009, China*

**Table S1.** Comparison of different methods for Api detection.

| Method                                        | Line range            | Detection limit            | Ref              |
|-----------------------------------------------|-----------------------|----------------------------|------------------|
| Column-switching HPLC assay                   | 6.667 ~ 133.333 ng/mL | 10 ng/mL                   | 11               |
| HPLC                                          | 0.1744 ~ 13.95 µg/mL  | 31.45 ng/mL                | 12               |
| LC-MS                                         | 2.5 ~ 5000 ng/mL      | 2.5 ng/mL                  | 13               |
| Hollow fiber liquid phase microextraction     | 0.10 ~ 300 ng/mL      | 0.1 ng/mL                  | 14               |
| RP-HPLC                                       | 16.5 ~ 1860 ng/mL     | 1.94 ng/mL                 | 15               |
| Ionic liquid coupled with HPLC quantification | 0.2 ~ 400.0 µg/mL     | 0.11 µg/mL                 | 16               |
| HPLC                                          | 0.5 ~ 200 µmol/L      | 0.1 µmol/L                 | 17               |
| LC with Electrochemical Detection             | 0.14~177.27 µg/mL     | 3.5×10 <sup>-2</sup> µg/mL | 18               |
| Capillary zone electrophoresis/UV detection   | 8.8 ~ 133.3 µg/mL     | 0.2538 µg/mL               | 29               |
| Capillary Electrophoresis Method              | 5.0 ~ 300 µg/mL       | 3.80 µg/mL                 | 30               |
| Capillary Electrophoresis with diode array    | 3~800 µg/mL           | 0.53 µg/mL                 | 31               |
| Micellar Electrokinetic Chromatography- UV    | 1.0~100 µmol/L        | 0.48µmol/L                 | 32               |
| <b>Fluorescence sensor (N-CDs)</b>            | <b>0.1~60 µmol/L</b>  | <b>80 nmol/L</b>           | <b>this work</b> |

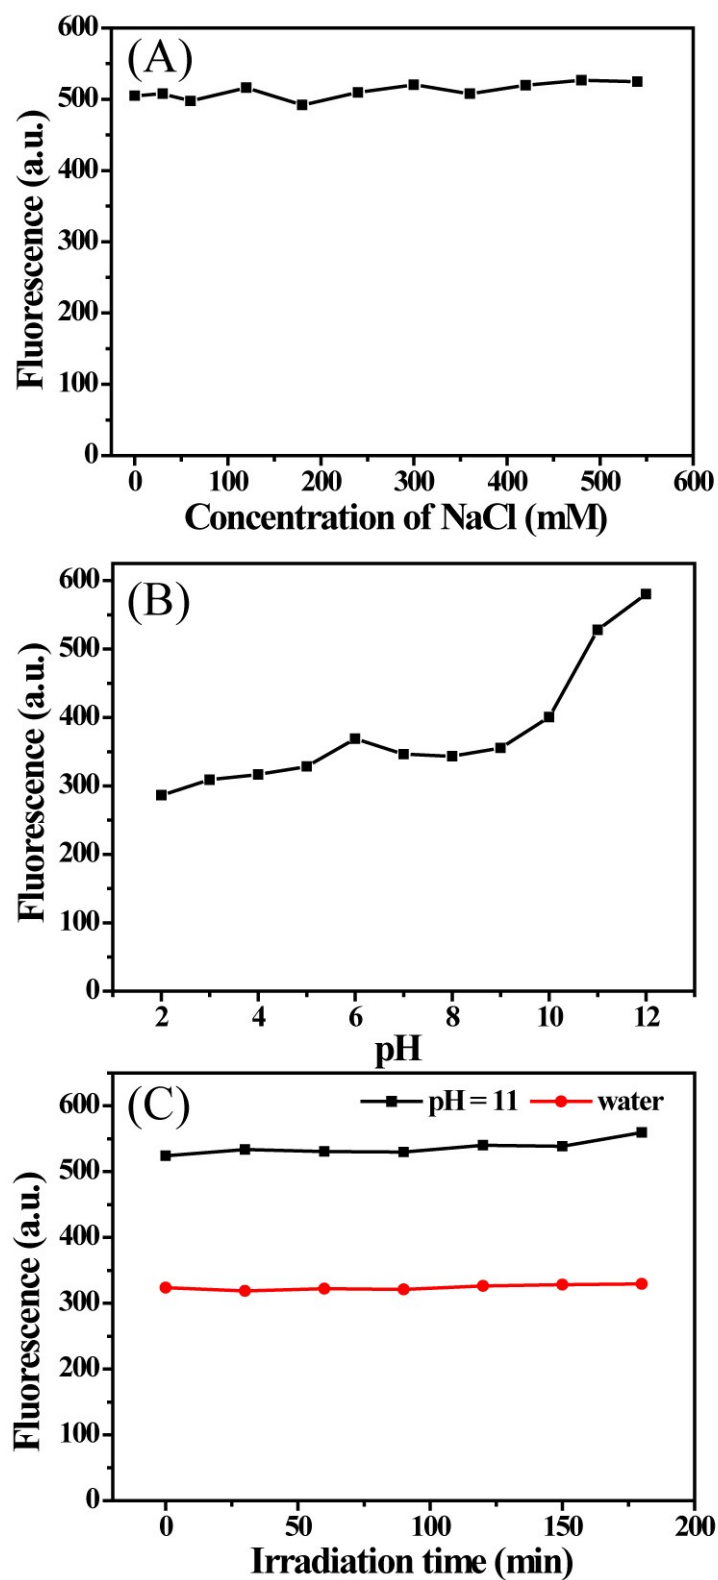

**Figure S1** Stability performance of N-CDs. Effect of ionic strength (A), pH (B), UV lamp irradiation (in water and in pH 11 Britton-Robinson solution) (C) on the fluorescence intensity of N-CDs.

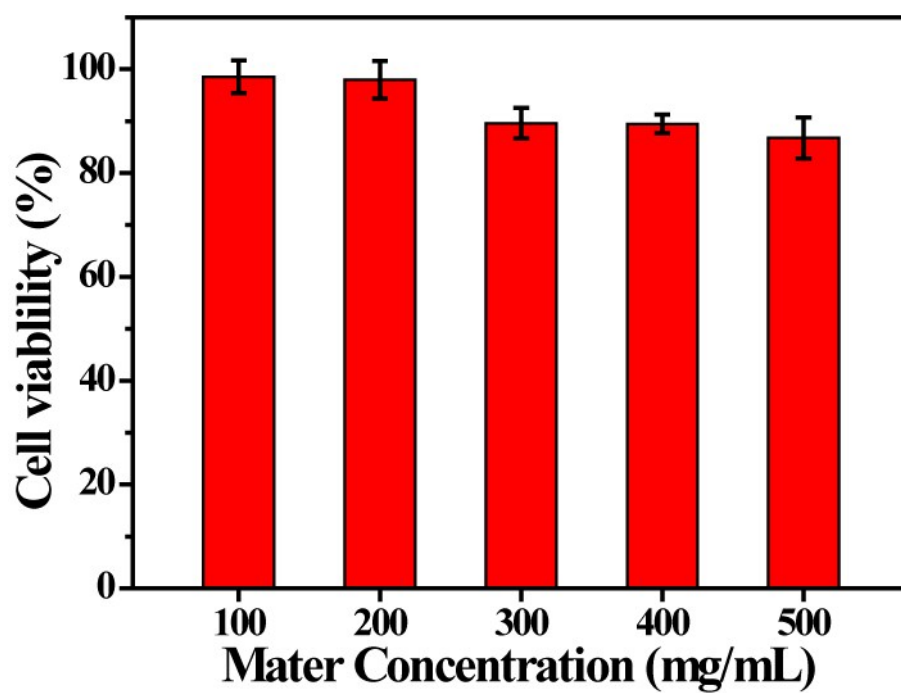

**Figure S2** Cell viability of the HeLa cells after incubation with N-CDs for 24 h.
